# Supplementary material for: Comparative analysis of codon usage patterns in chloroplast genomes of five Miscanthus species and related species
Source: PeerJ. 2021 Sep 23;9:e12173. doi: 10.7717/peerj.12173 (PMC8466072; doi:10.7717/peerj.12173)
Supplement: Supplemental Information 1 [file peerj-09-12173-s001.xlsx]

## Sheet: Miscanthus_floridulus
Table S1:RSCU and RFSC values of the codons in chloroplast genomes of seven Misacnthus and related species
	Miscanthus_floridulus				Miscanthus_giganteus			Miscanthus_sacchariflorus			Miscanthus_sinensis			Miscanthus_transmorrisonensis			Saccharum_spontaneum			Sorghum_bicolor
Amino_acid	Codon	Number	RSCU	RFSC	Number	RSCU	RFSC	Number	RSCU	RFSC	Number	RSCU	RFSC	Number	RSCU	RFSC	Number	RSCU	RFSC	Number	RSCU	RFSC
Ala	GCA	348	1.15807	0.29	353	1.17765	0.294	348	1.16681	0.292	348	1.16583	0.291	348	1.16388	0.291	317	1.19736	0.299	318	1.16271	0.291
Ala	GCC	189	0.628952	0.157	186	0.620517	0.155	186	0.623638	0.156	184	0.616415	0.154	186	0.622074	0.156	157	0.593012	0.148	165	0.603291	0.151
Ala	GCG	135	0.449251	0.112	132	0.440367	0.11	127	0.425817	0.106	128	0.428811	0.107	134	0.448161	0.112	110	0.415486	0.104	121	0.442413	0.111
Ala	GCT	530	1.76373	0.441	528	1.76147	0.44	532	1.78374	0.446	534	1.78894	0.447	528	1.76589	0.441	475	1.79415	0.449	490	1.79159	0.448
Cys	TGC	56	0.511416	0.256	53	0.488479	0.244	55	0.506912	0.253	55	0.506912	0.253	53	0.490741	0.245	45	0.511364	0.256	48	0.516129	0.258
Cys	TGT	163	1.48858	0.744	164	1.51152	0.756	162	1.49309	0.747	162	1.49309	0.747	163	1.50926	0.755	131	1.48864	0.744	138	1.48387	0.742
Asp	GAC	154	0.432584	0.216	151	0.425952	0.213	156	0.435146	0.218	156	0.435146	0.218	152	0.428773	0.214	136	0.443719	0.222	138	0.425926	0.213
Asp	GAT	558	1.56742	0.784	558	1.57405	0.787	561	1.56485	0.782	561	1.56485	0.782	557	1.57123	0.786	477	1.55628	0.778	510	1.57407	0.787
Glu	GAA	766	1.49756	0.749	760	1.49606	0.748	767	1.49367	0.747	767	1.49367	0.747	759	1.49557	0.748	664	1.48879	0.744	708	1.50159	0.751
Glu	GAG	257	0.502444	0.251	256	0.503937	0.252	260	0.506329	0.253	260	0.506329	0.253	256	0.504433	0.252	228	0.511211	0.256	235	0.498409	0.249
Phe	TTC	422	0.748227	0.374	423	0.753339	0.377	418	0.744435	0.372	419	0.745552	0.373	420	0.747996	0.374	328	0.71851	0.359	352	0.711111	0.356
Phe	TTT	706	1.25177	0.626	700	1.24666	0.623	705	1.25557	0.628	705	1.25445	0.627	703	1.252	0.626	585	1.28149	0.641	638	1.28889	0.644
Gly	GGA	566	1.5788	0.395	559	1.57133	0.393	560	1.58304	0.396	560	1.58304	0.396	560	1.57193	0.393	507	1.6224	0.406	523	1.60307	0.401
Gly	GGC	163	0.454672	0.114	162	0.455376	0.114	166	0.469258	0.117	167	0.472085	0.118	162	0.454737	0.114	139	0.4448	0.111	145	0.444444	0.111
Gly	GGG	274	0.764296	0.191	273	0.767393	0.192	262	0.740636	0.185	263	0.743463	0.186	272	0.763509	0.191	213	0.6816	0.17	231	0.708046	0.177
Gly	GGT	431	1.20223	0.301	429	1.2059	0.301	427	1.20707	0.302	425	1.20141	0.3	431	1.20982	0.302	391	1.2512	0.313	406	1.24444	0.311
His	CAC	121	0.55	0.275	120	0.547945	0.274	115	0.537383	0.269	115	0.537383	0.269	119	0.545872	0.273	100	0.533333	0.267	107	0.540404	0.27
His	CAT	319	1.45	0.725	318	1.45205	0.726	313	1.46262	0.731	313	1.46262	0.731	317	1.45413	0.727	275	1.46667	0.733	289	1.4596	0.73
Ile	ATA	524	0.967385	0.322	522	0.970862	0.324	525	0.971023	0.324	523	0.967921	0.323	520	0.965944	0.322	431	0.936957	0.312	454	0.938663	0.313
Ile	ATC	316	0.583385	0.194	310	0.576565	0.192	308	0.569667	0.19	309	0.571869	0.191	313	0.581424	0.194	259	0.563043	0.188	269	0.556168	0.185
Ile	ATT	785	1.44923	0.483	781	1.45257	0.484	789	1.45931	0.486	789	1.46021	0.487	782	1.45263	0.484	690	1.5	0.5	728	1.50517	0.502
Lys	AAA	715	1.46667	0.733	704	1.46058	0.73	712	1.45158	0.726	711	1.44954	0.725	709	1.46639	0.733	593	1.48808	0.744	632	1.47664	0.738
Lys	AAG	260	0.533333	0.267	260	0.539419	0.27	269	0.54842	0.274	270	0.550459	0.275	258	0.533609	0.267	204	0.51192	0.256	224	0.523364	0.262
Leu	CTA	319	0.880405	0.147	318	0.885383	0.148	319	0.892724	0.149	319	0.892724	0.149	318	0.882516	0.147	263	0.865606	0.144	281	0.874935	0.146
Leu	CTC	157	0.433303	0.072	156	0.434339	0.072	140	0.391791	0.065	140	0.391791	0.065	156	0.432932	0.072	121	0.398245	0.066	127	0.395433	0.066
Leu	CTG	113	0.311868	0.052	112	0.311833	0.052	114	0.31903	0.053	114	0.31903	0.053	112	0.310823	0.052	96	0.315963	0.053	105	0.326933	0.054
Leu	CTT	503	1.38822	0.231	497	1.38376	0.231	493	1.37966	0.23	494	1.38246	0.23	501	1.39038	0.232	388	1.27702	0.213	416	1.29528	0.216
Leu	TTA	698	1.9264	0.321	694	1.93225	0.322	694	1.94216	0.324	693	1.93937	0.323	695	1.92877	0.321	631	2.0768	0.346	654	2.03633	0.339
Leu	TTG	384	1.0598	0.177	378	1.05244	0.175	384	1.07463	0.179	384	1.07463	0.179	380	1.05458	0.176	324	1.06637	0.178	344	1.07109	0.179
Met	ATG	443	1	1	440	1	1	442	1	1	441	1	1	439	1	1	384	1	1	404	1	1
Asn	AAC	200	0.520833	0.26	194	0.513228	0.257	197	0.519104	0.26	197	0.518421	0.259	198	0.521053	0.261	170	0.515152	0.258	182	0.52	0.26
Asn	AAT	568	1.47917	0.74	562	1.48677	0.743	562	1.4809	0.74	563	1.48158	0.741	562	1.47895	0.739	490	1.48485	0.742	518	1.48	0.74
Pro	CCA	232	1.06912	0.267	228	1.06418	0.266	224	1.05288	0.263	223	1.04818	0.262	229	1.06388	0.266	183	1.02809	0.257	192	1.03226	0.258
Pro	CCC	221	1.01843	0.255	214	0.998833	0.25	213	1.00118	0.25	213	1.00118	0.25	219	1.01742	0.254	171	0.960674	0.24	180	0.967742	0.242
Pro	CCG	98	0.451613	0.113	97	0.452742	0.113	97	0.455934	0.114	97	0.455934	0.114	97	0.450639	0.113	79	0.44382	0.111	86	0.462366	0.116
Pro	CCT	317	1.46083	0.365	318	1.48425	0.371	317	1.49001	0.373	318	1.49471	0.374	316	1.46806	0.367	279	1.56742	0.392	286	1.53763	0.384
Gln	CAA	509	1.53776	0.769	509	1.54242	0.771	512	1.52155	0.761	513	1.52452	0.762	507	1.53636	0.768	446	1.55401	0.777	472	1.54501	0.773
Gln	CAG	153	0.462236	0.231	151	0.457576	0.229	161	0.478455	0.239	160	0.475483	0.238	153	0.463636	0.232	128	0.445993	0.223	139	0.454992	0.227
Arg	AGA	346	1.72282	0.287	346	1.73144	0.289	343	1.72796	0.288	341	1.72077	0.287	346	1.73	0.288	287	1.76615	0.294	297	1.72008	0.287
Arg	AGG	131	0.652282	0.109	131	0.655546	0.109	124	0.624685	0.104	123	0.62069	0.103	130	0.65	0.108	95	0.584615	0.097	97	0.561776	0.094
Arg	CGA	256	1.27469	0.212	255	1.27606	0.213	257	1.29471	0.216	258	1.30193	0.217	255	1.275	0.212	213	1.31077	0.218	231	1.33784	0.223
Arg	CGC	110	0.547718	0.091	107	0.535446	0.089	110	0.554156	0.092	110	0.555088	0.093	108	0.54	0.09	84	0.516923	0.086	90	0.521236	0.087
Arg	CGG	94	0.46805	0.078	93	0.465388	0.078	89	0.448363	0.075	89	0.449117	0.075	93	0.465	0.077	65	0.4	0.067	74	0.428571	0.071
Arg	CGT	268	1.33444	0.222	267	1.33611	0.223	268	1.35013	0.225	268	1.3524	0.225	268	1.34	0.223	231	1.42154	0.237	247	1.4305	0.238
Ser	AGC	102	0.428872	0.071	102	0.432509	0.072	114	0.483051	0.081	115	0.488323	0.081	102	0.431898	0.072	85	0.436644	0.073	89	0.42926	0.072
Ser	AGT	272	1.14366	0.191	271	1.14912	0.192	272	1.15254	0.192	270	1.1465	0.191	271	1.14749	0.191	240	1.23288	0.205	252	1.21543	0.203
Ser	TCA	238	1.0007	0.167	237	1.00495	0.167	233	0.987288	0.165	232	0.985138	0.164	237	1.00353	0.167	197	1.01199	0.169	213	1.02733	0.171
Ser	TCC	303	1.274	0.212	299	1.26784	0.211	288	1.22034	0.203	290	1.23142	0.205	300	1.27029	0.212	240	1.23288	0.205	250	1.20579	0.201
Ser	TCG	126	0.529783	0.088	125	0.530035	0.088	129	0.54661	0.091	129	0.547771	0.091	125	0.529287	0.088	99	0.508562	0.085	111	0.53537	0.089
Ser	TCT	386	1.62299	0.27	381	1.61555	0.269	380	1.61017	0.268	377	1.60085	0.267	382	1.6175	0.27	307	1.57705	0.263	329	1.58682	0.264
Thr	ACA	275	1.04962	0.262	272	1.04415	0.261	276	1.05545	0.264	276	1.05444	0.264	274	1.04981	0.262	244	1.10282	0.276	247	1.06811	0.267
Thr	ACC	203	0.774809	0.194	202	0.775432	0.194	201	0.768642	0.192	201	0.767908	0.192	202	0.773946	0.193	163	0.736723	0.184	173	0.748108	0.187
Thr	ACG	130	0.496183	0.124	130	0.49904	0.125	127	0.48566	0.121	128	0.489016	0.122	130	0.498084	0.125	104	0.470056	0.118	114	0.492973	0.123
Thr	ACT	440	1.67939	0.42	438	1.68138	0.42	442	1.69025	0.423	442	1.68863	0.422	438	1.67816	0.42	374	1.6904	0.423	391	1.69081	0.423
Val	GTA	415	1.48214	0.371	411	1.47842	0.37	412	1.49005	0.373	412	1.4914	0.373	412	1.48602	0.372	363	1.50311	0.376	378	1.50149	0.375
Val	GTC	125	0.446429	0.112	126	0.453237	0.113	125	0.45208	0.113	126	0.456109	0.114	124	0.44725	0.112	103	0.426501	0.107	111	0.440914	0.11
Val	GTG	157	0.560714	0.14	153	0.55036	0.138	150	0.542495	0.136	148	0.535747	0.134	152	0.548242	0.137	124	0.513458	0.128	128	0.508441	0.127
Val	GTT	423	1.51071	0.378	422	1.51799	0.379	419	1.51537	0.379	419	1.51674	0.379	421	1.51849	0.38	376	1.55694	0.389	390	1.54916	0.387
Trp	TGG	361	1	1	361	1	1	376	1	1	376	1	1	361	1	1	306	1	1	321	1	1
Tyr	TAC	146	0.410112	0.205	145	0.410765	0.205	146	0.407252	0.204	146	0.40612	0.203	145	0.410184	0.205	119	0.39866	0.199	129	0.396923	0.198
Tyr	TAT	566	1.58989	0.795	561	1.58924	0.795	571	1.59275	0.796	573	1.59388	0.797	562	1.58982	0.795	478	1.60134	0.801	521	1.60308	0.802
Ter	TAA	27	1.24615	0.415	27	1.26562	0.422	27	1.26562	0.422	27	1.26562	0.422	27	1.26562	0.422	24	1.5	0.5	26	1.5	0.5
Ter	TAG	18	0.830769	0.277	18	0.84375	0.281	20	0.9375	0.312	20	0.9375	0.312	18	0.84375	0.281	13	0.8125	0.271	14	0.807692	0.269
Ter	TGA	20	0.923077	0.308	19	0.890625	0.297	17	0.796875	0.266	17	0.796875	0.266	19	0.890625	0.297	11	0.6875	0.229	12	0.692308	0.231
