# Supplementary material for: Comparative analysis of codon usage patterns in chloroplast genomes of five Miscanthus species and related species
Source: PeerJ. 2021 Sep 23;9:e12173. doi: 10.7717/peerj.12173 (PMC8466072; doi:10.7717/peerj.12173)
Supplement: Supplemental Information 2 [file peerj-09-12173-s002.xlsx]

## Sheet: Miscanthus_floridulus
Table S2：The RSCU values and Δ RSCU value in the high and low expression library of the seven Miscanthus and related species
		Miscanthus_floridulus				Miscanthus_giganteus				Miscanthus_sacchariflorus				Miscanthus_sinensis				Miscanthus_transmorrisonensis				Saccharum_spontaneum				Sorghum_bicolor
Amino_acid	Codon	RSCU_high	RSCU_low	RSCU_diff	is_opt	RSCU_high	RSCU_low	RSCU_diff	is_opt	RSCU_high	RSCU_low	RSCU_diff	is_opt	RSCU_high	RSCU_low	RSCU_diff	is_opt	RSCU_high	RSCU_low	RSCU_diff	is_opt	RSCU_high	RSCU_low	RSCU_diff	is_opt	RSCU_high	RSCU_low	RSCU_diff	is_opt
Ala	GCA	0.833333	1.71429	0.880952	0	1	1.71429	0.714286	0	1	1.5814	0.581395	0	0.333333	1.2973	0.963964	0	0.727273	1.71429	0.987013	0	1.33333	1.625	0.291667	0	0.235294	1.12821	0.892911	0
Ala	GCC	0.5	0.571429	0.0714286	0	0.714286	0.571429	0.142857	0	1.33333	0.27907	1.05426	1	1.33333	0.324324	1.00901	1	0.848485	0.571429	0.277056	0	1	0.375	0.625	0	1.17647	0.102564	1.07391	1
Ala	GCG	1	0.244898	0.755102	0	0.857143	0.326531	0.530612	0	0	0.55814	0.55814	0	0.333333	0.648649	0.315315	0	0.727273	0.244898	0.482375	0	0	0.375	0.375	0	0.705882	0.205128	0.500754	0
Ala	GCT	1.66667	1.46939	0.197279	0	1.42857	1.38776	0.0408163	0	1.66667	1.5814	0.0852713	0	2	1.72973	0.27027	0	1.69697	1.46939	0.227582	0	1.66667	1.625	0.0416667	0	1.88235	2.5641	0.68175	0
Cys	TGC	0.4	0	0.4	0	0.5	0	0.5	0	0	0	0	0	0.5	0	0.5	0	0.5	0	0.5	0	0.363636	0	0.363636	0	0.571429	0.5	0.0714286	0
Cys	TGT	1.6	2	0.4	0	1.5	2	0.5	0	2	2	0	0	1.5	2	0.5	0	1.5	2	0.5	0	1.63636	2	0.363636	0	1.42857	1.5	0.0714286	0
Asp	GAC	0.461538	0.555556	0.0940171	0	0.47619	0.555556	0.0793651	0	0.533333	0.5	0.0333333	0	0.636364	0.588235	0.0481283	0	0.533333	0.555556	0.0222222	0	0.142857	0.533333	0.390476	0	0.608696	0.5	0.108696	0
Asp	GAT	1.53846	1.44444	0.0940171	0	1.52381	1.44444	0.0793651	0	1.46667	1.5	0.0333333	0	1.36364	1.41176	0.0481283	0	1.46667	1.44444	0.0222222	0	1.85714	1.46667	0.390476	0	1.3913	1.5	0.108696	0
Glu	GAA	1.4375	1.81818	0.380682	0	1.28	1.76471	0.484706	0	1.71429	1.6875	0.0267857	0	1.76471	1.42857	0.336134	0	1.45455	1.81818	0.363636	0	1.625	1.77778	0.152778	0	1.29412	1.2	0.0941176	0
Glu	GAG	0.5625	0.181818	0.380682	0	0.72	0.235294	0.484706	0	0.285714	0.3125	0.0267857	0	0.235294	0.571429	0.336134	0	0.545455	0.181818	0.363636	0	0.375	0.222222	0.152778	0	0.705882	0.8	0.0941176	0
Phe	TTC	0.714286	0.344828	0.369458	0	1.03448	0.344828	0.689655	1	0.785714	0.333333	0.452381	0	1.2381	0.222222	1.01587	1	0.967742	0.344828	0.622914	0	0.5	0.307692	0.192308	0	1	1.5	0.5	0
Phe	TTT	1.28571	1.65517	0.369458	0	0.965517	1.65517	0.689655	0	1.21429	1.66667	0.452381	0	0.761905	1.77778	1.01587	0	1.03226	1.65517	0.622914	0	1.5	1.69231	0.192308	0	1	0.5	0.5	0
Gly	GGA	1.17647	1.73913	0.56266	0	1.14286	1.73913	0.596273	0	1.92	1.46939	0.450612	0	1.4	1.05263	0.347368	0	1.4	1.73913	0.33913	0	1.73913	1.66667	0.0724638	0	1.4	0.864865	0.535135	1
Gly	GGC	0.470588	0.521739	0.0511509	0	0.380952	0.521739	0.140787	0	0.64	0.653061	0.0130612	0	1.2	0.631579	0.568421	1	0.5	0.521739	0.0217391	0	0.173913	0.666667	0.492754	0	0.8	0.216216	0.583784	0
Gly	GGG	0.705882	0.26087	0.445013	0	0.952381	0.26087	0.691511	0	0.48	0.244898	0.235102	0	0.2	0.421053	0.221053	0	0.4	0.26087	0.13913	0	0.869565	0.111111	0.758454	0	0.4	0.216216	0.183784	0
Gly	GGT	1.64706	1.47826	0.168798	0	1.52381	1.47826	0.0455487	0	0.96	1.63265	0.672653	0	1.2	1.89474	0.694737	0	1.7	1.47826	0.221739	0	1.21739	1.55556	0.338164	0	1.4	2.7027	1.3027	0
His	CAC	1.42857	0	1.42857	1	0.421053	0	0.421053	0	1	0	1	0	0.5	0.666667	0.166667	0	0.461538	0	0.461538	0	1	0	1	0	0.5	1.14286	0.642857	0
His	CAT	0.571429	2	1.42857	0	1.57895	2	0.421053	0	1	2	1	0	1.5	1.33333	0.166667	0	1.53846	2	0.461538	0	1	2	1	0	1.5	0.857143	0.642857	1
Ile	ATA	1	1.11429	0.114286	0	1.13333	1.13043	0.00289855	0	1.40426	1.04348	0.360777	0	1.65789	0.947368	0.710526	1	1.11111	1.11429	0.0031746	0	1.14286	1.1	0.0428571	0	1.44	0.352941	1.08706	1
Ile	ATC	0.25	0.385714	0.135714	0	0.666667	0.391304	0.275362	0	0.510638	0.434783	0.0758557	0	0.631579	0.394737	0.236842	0	0.388889	0.385714	0.0031746	0	0.214286	0.45	0.235714	0	0.24	0.882353	0.642353	0
Ile	ATT	1.75	1.5	0.25	0	1.2	1.47826	0.278261	0	1.08511	1.52174	0.436633	0	0.710526	1.65789	0.947368	0	1.5	1.5	0	0	1.64286	1.45	0.192857	0	1.32	1.76471	0.444706	0
Lys	AAA	1.52941	1.77143	0.242017	0	1.68421	1.77143	0.087218	0	1.4	1.83333	0.433333	0	1.42857	1.7	0.271429	0	1.57576	1.77143	0.195671	0	1.6	2	0.4	0	1.36842	1.57143	0.203008	0
Lys	AAG	0.470588	0.228571	0.242017	0	0.315789	0.228571	0.087218	0	0.6	0.166667	0.433333	0	0.571429	0.3	0.271429	0	0.424242	0.228571	0.195671	0	0.4	0	0.4	0	0.631579	0.428571	0.203008	0
Leu	CTA	0.9375	1.01205	0.0745482	0	0.677419	1.01205	0.334629	0	1.46667	1.0625	0.404167	0	1.2	0.763636	0.436364	1	0.705882	1.01205	0.306166	0	1.22727	1.1831	0.0441741	0	0.857143	1.04348	0.186335	0
Leu	CTC	0.46875	0.506024	0.0372741	0	0.967742	0.506024	0.461718	0	0.933333	0.5	0.433333	0	0.96	0.327273	0.632727	0	0.441176	0.506024	0.0648476	0	0.409091	0.507042	0.0979513	0	0.514286	0	0.514286	0
Leu	CTG	0.09375	0.289157	0.195407	0	0.0967742	0.289157	0.192382	0	0.4	0.25	0.15	0	0.48	0.218182	0.261818	0	0.0882353	0.289157	0.200921	0	0.136364	0.338028	0.201665	0	0.171429	0.26087	0.089441	0
Leu	CTT	0.9375	0.86747	0.0700301	0	1.45161	0.86747	0.584143	1	1.33333	0.8125	0.520833	1	0.48	0.763636	0.283636	0	1.41176	0.86747	0.544295	1	1.77273	0.84507	0.927657	1	1.02857	1.30435	0.275776	0
Leu	TTA	2.71875	2.81928	0.100527	0	2.03226	2.81928	0.787019	0	1.46667	2.875	1.40833	0	2.16	2.94545	0.785455	0	2.64706	2.81928	0.172218	0	1.90909	2.70423	0.795134	0	2.74286	1.69565	1.0472	0
Leu	TTG	0.84375	0.506024	0.337726	0	0.774194	0.506024	0.268169	0	0.4	0.5	0.1	0	0.72	0.981818	0.261818	0	0.705882	0.506024	0.199858	0	0.545455	0.422535	0.122919	0	0.685714	1.69565	1.00994	0
Met	ATG	1	1	0	0	1	1	0	0	1	1	0	0	1	1	0	0	1	1	0	0	1	1	0	0	1	1	0	0
Asn	AAC	0.272727	0.25	0.0227273	0	0.333333	0.25	0.0833333	0	0.571429	0.166667	0.404762	0	0.166667	0.5	0.333333	0	0.315789	0.25	0.0657895	0	0.625	0.125	0.5	0	0.363636	1	0.636364	0
Asn	AAT	1.72727	1.75	0.0227273	0	1.66667	1.75	0.0833333	0	1.42857	1.83333	0.404762	0	1.83333	1.5	0.333333	0	1.68421	1.75	0.0657895	0	1.375	1.875	0.5	0	1.63636	1	0.636364	0
Pro	CCA	1.17073	0.96	0.210732	1	1.33333	0.96	0.373333	1	1	0.972973	0.027027	0	0.727273	0.848485	0.121212	0	1.2973	0.96	0.337297	1	1.14286	0.8	0.342857	1	1.27273	1	0.272727	0
Pro	CCC	0.97561	1.28	0.30439	0	1.33333	1.28	0.0533333	0	1.2	1.51351	0.313514	0	1.63636	1.33333	0.30303	0	0.972973	1.28	0.307027	0	0.571429	1.4	0.828571	0	0.727273	0	0.727273	0
Pro	CCG	0.682927	0.32	0.362927	0	0.484848	0.32	0.164848	0	0.6	0.216216	0.383784	0	0.545455	0.363636	0.181818	0	0.756757	0.32	0.436757	0	0.571429	0	0.571429	0	0.909091	0.2	0.709091	0
Pro	CCT	1.17073	1.44	0.269268	0	0.848485	1.44	0.591515	0	1.2	1.2973	0.0972973	0	1.09091	1.45455	0.363636	0	0.972973	1.44	0.467027	0	1.71429	1.8	0.0857143	0	1.09091	2.8	1.70909	0
Gln	CAA	2	1.52381	0.47619	0	1.29412	1.52381	0.229692	0	1.75	1.41176	0.338235	0	1.4	1.53846	0.138462	0	1.56522	1.52381	0.0414079	0	1.84615	1.33333	0.512821	0	1.6	1.4	0.2	0
Gln	CAG	0	0.47619	0.47619	0	0.705882	0.47619	0.229692	0	0.25	0.588235	0.338235	0	0.6	0.461538	0.138462	0	0.434783	0.47619	0.0414079	0	0.153846	0.666667	0.512821	0	0.4	0.6	0.2	0
Arg	AGA	1.6	1.67442	0.0744186	0	1.61538	1.67442	0.059034	0	1.75	1.61538	0.134615	0	1.6875	0.75	0.9375	1	1.55556	1.67442	0.118863	0	1.71429	1.71429	0	0	1.75	1.07143	0.678571	0
Arg	AGG	0.2	0.27907	0.0790698	0	1.38462	0.27907	1.10555	1	1.5	0.461538	1.03846	1	1.3125	0	1.3125	1	0.222222	0.27907	0.0568475	0	0.428571	0.571429	0.142857	0	0.25	0.428571	0.178571	0
Arg	CGA	1.2	1.53488	0.334884	0	1.15385	1.53488	0.381038	0	0.75	1.61538	0.865385	0	0.5625	2	1.4375	0	1.77778	1.53488	0.242894	0	0.857143	2	1.14286	0	1.5	1.07143	0.428571	0
Arg	CGC	0.8	0.27907	0.52093	0	0.230769	0.27907	0.0483005	0	0.5	0.461538	0.0384615	0	0.5625	0.5	0.0625	0	0.444444	0.27907	0.165375	0	0.857143	0.285714	0.571429	0	0.5	1.07143	0.571429	0
Arg	CGG	0.6	0.139535	0.460465	0	0.923077	0.139535	0.783542	0	1	0	1	0	0.75	0	0.75	0	0.444444	0.139535	0.30491	0	0.857143	0	0.857143	0	0.25	0.214286	0.0357143	0
Arg	CGT	1.6	2.09302	0.493023	0	0.692308	2.09302	1.40072	0	0.5	1.84615	1.34615	0	1.125	2.75	1.625	0	1.55556	2.09302	0.537468	0	1.28571	1.42857	0.142857	0	1.75	2.14286	0.392857	0
Ser	AGC	0	0.24	0.24	0	0.571429	0.24	0.331429	0	0.413793	0.272727	0.141066	0	0.62069	0	0.62069	0	0.413793	0.24	0.173793	0	0	0.292683	0.292683	0	0.146341	0.769231	0.622889	0
Ser	AGT	1.64706	1.08	0.567059	0	0.714286	1.08	0.365714	0	0.827586	0.954545	0.126959	0	1.24138	2	0.758621	0	1.44828	1.08	0.368276	0	1	1.02439	0.0243902	0	1.7561	1.69231	0.0637899	0
Ser	TCA	1.64706	0.96	0.687059	1	1.14286	0.96	0.182857	1	1.03448	0.954545	0.0799373	0	0.413793	1.14286	0.729064	0	1.34483	0.96	0.384828	1	1.5	0.878049	0.621951	1	1.02439	0.307692	0.716698	1
Ser	TCC	1.17647	1.32	0.143529	0	1.71429	1.32	0.394286	0	1.86207	1.22727	0.634796	0	1.65517	1.71429	0.0591133	0	0.931034	1.32	0.388966	0	1.25	1.02439	0.22561	0	0.878049	1.23077	0.35272	0
Ser	TCG	0.352941	0.48	0.127059	0	0.285714	0.48	0.194286	0	0.827586	0.409091	0.418495	0	0.413793	0.571429	0.157635	0	0.310345	0.48	0.169655	0	1	0.439024	0.560976	0	0.292683	0	0.292683	0
Ser	TCT	1.17647	1.92	0.743529	0	1.57143	1.92	0.348571	0	1.03448	2.18182	1.14734	0	1.65517	0.571429	1.08374	1	1.55172	1.92	0.368276	0	1.25	2.34146	1.09146	0	1.90244	2	0.097561	0
Thr	ACA	1.56522	1.44	0.125217	0	0.96	1.44	0.48	0	0.210526	1.42857	1.21805	0	0	1.21212	1.21212	0	1.26829	1.44	0.171707	0	1.16667	1.41176	0.245098	0	1.21739	0.761905	0.455487	1
Thr	ACC	0.347826	0.48	0.132174	0	0.64	0.48	0.16	0	0.842105	0.428571	0.413534	0	1.09091	0.606061	0.484848	1	0.585366	0.48	0.105366	0	0.5	0.470588	0.0294118	0	0.521739	1.14286	0.621118	0
Thr	ACG	0.521739	0.16	0.361739	0	0.8	0.16	0.64	0	1.26316	0.285714	0.977444	1	1.81818	0.363636	1.45455	1	0.390244	0.16	0.230244	0	0.833333	0	0.833333	0	0.347826	0	0.347826	0
Thr	ACT	1.56522	1.92	0.354783	0	1.6	1.92	0.32	0	1.68421	1.85714	0.172932	0	1.09091	1.81818	0.727273	0	1.7561	1.92	0.163902	0	1.5	2.11765	0.617647	0	1.91304	2.09524	0.182195	0
Val	GTA	1.48571	1.56098	0.0752613	0	1.1	1.5814	0.481395	0	1.37931	1.83333	0.454023	0	1.03704	1.81132	0.774284	0	0.93617	1.56098	0.624805	0	1.52381	1.69697	0.17316	0	0.923077	1.83333	0.910256	0
Val	GTC	0.457143	0.195122	0.262021	0	0.9	0.186047	0.713953	0	0.827586	0.25	0.577586	0	1.03704	0.45283	0.584207	1	0.93617	0.195122	0.741048	0	0.380952	0.242424	0.138528	0	0.769231	0	0.769231	0
Val	GTG	0.685714	0.390244	0.29547	0	0.6	0.372093	0.227907	0	0.275862	0.333333	0.0574713	0	0.444444	0.528302	0.0838574	0	0.510638	0.390244	0.120394	0	0.571429	0.242424	0.329004	0	0.923077	0.166667	0.75641	0
Val	GTT	1.37143	1.85366	0.48223	0	1.4	1.86047	0.460465	0	1.51724	1.58333	0.066092	0	1.48148	1.20755	0.273934	0	1.61702	1.85366	0.236637	0	1.52381	1.81818	0.294372	0	1.38462	2	0.615385	0
Trp	TGG	1	1	0	0	1	1	0	0	1	1	0	0	1	1	0	0	1	1	0	0	1	1	0	0	1	1	0	0
Tyr	TAC	0.923077	0.315789	0.607287	0	0.173913	0.315789	0.141876	0	0.181818	0.47619	0.294372	0	0.133333	0.5	0.366667	0	0.322581	0.315789	0.00679117	0	0.777778	0.352941	0.424837	0	0.47619	0.666667	0.190476	0
Tyr	TAT	1.07692	1.68421	0.607287	0	1.82609	1.68421	0.141876	0	1.81818	1.52381	0.294372	0	1.86667	1.5	0.366667	0	1.67742	1.68421	0.00679117	0	1.22222	1.64706	0.424837	0	1.52381	1.33333	0.190476	0
Ter	TAA	0	3	3	0	0	3	3	0	1	2	1	0	0	1	1	0	0	3	3	0	1.5	3	1.5	0	0	3	3	0
Ter	TAG	3	0	3	1	0	0	0	0	2	1	1	0	2	2	0	0	1	0	1	0	1.5	0	1.5	1	1.5	0	1.5	1
Ter	TGA	0	0	0	0	3	0	3	1	0	0	0	0	1	0	1	0	2	0	2	1	0	0	0	0	1.5	0	1.5	1
