# Supplementary material for: Comparative analysis of codon usage patterns in chloroplast genomes of five Miscanthus species and related species
Source: PeerJ. 2021 Sep 23;9:e12173. doi: 10.7717/peerj.12173 (PMC8466072; doi:10.7717/peerj.12173)
Supplement: Supplemental Information 3 [file peerj-09-12173-s003.xlsx]

## Sheet: floridulus--thaliana
Table S3: Comparison of codon usage frequency between seven Miscanthus related species and four organisms
		floridulus--thaliana	floridulus--trichocarpa	floridulus--coli	floridulus--cerevisiae	giganteus--thaliana	giganteus--trichocarpa	giganteus--coli	giganteus--cerevisiae	sacchariflorus--thaliana	sacchariflorus--trichocarpa	sacchariflorus--coli	sacchariflorus--cerevisiae	sinensis--thaliana	sinensis--trichocarpa	sinensis--coli	sinensis--cerevisiae	transmorrisonensis--thaliana	transmorrisonensis--trichocarpa	transmorrisonensis--coli	transmorrisonensis--cerevisiae	spontaneum--thaliana	spontaneum--trichocarpa	spontaneum--coli	spontaneum--cerevisiae	bicolor--thaliana	bicolor--trichocarpa	bicolor--coli	bicolor--cerevisiae
Amino_acid	Codon	Ratio	Ratio	Ratio	Ratio	Ratio	Ratio	Ratio	Ratio	Ratio	Ratio	Ratio	Ratio	Ratio	Ratio	Ratio	Ratio	Ratio	Ratio	Ratio	Ratio	Ratio	Ratio	Ratio	Ratio	Ratio	Ratio	Ratio	Ratio
Ala	GCA	1.014	0.882836	0.861408	1.09537	1.03606	0.90204	0.880146	1.1192	1.01937	0.887512	0.865971	1.10117	1.01949	0.887612	0.866068	1.1013	1.02051	0.888507	0.866942	1.10241	1.09434	0.952786	0.92966	1.18216	1.03897	0.904577	0.882621	1.12235
Ala	GCC	0.935631	0.983367	0.383944	0.764841	0.927573	0.974898	0.380637	0.758254	0.925728	0.972959	0.37988	0.756746	0.915825	0.962551	0.375817	0.748651	0.926699	0.97398	0.380279	0.75754	0.920874	0.967857	0.377888	0.752778	0.915922	0.962653	0.375857	0.74873
Ala	GCG	0.764889	1.86054	0.217161	1.11032	0.753333	1.83243	0.21388	1.09355	0.723333	1.75946	0.205363	1.05	0.729111	1.77351	0.207003	1.05839	0.764111	1.85865	0.21694	1.10919	0.738333	1.79595	0.209621	1.07177	0.768667	1.86973	0.218233	1.11581
Ala	GCT	0.954982	1.22845	1.73244	1.27481	0.958304	1.23273	1.73846	1.27925	0.96364	1.23959	1.74814	1.28637	0.96735	1.24436	1.75487	1.29132	0.957456	1.23164	1.73692	1.27811	1.01399	1.30436	1.83949	1.35358	0.989965	1.27345	1.7959	1.32151
Cys	TGC	0.396667	0.320899	0.413913	0.595	0.378056	0.305843	0.394493	0.567083	0.391528	0.316742	0.408551	0.587292	0.391667	0.316854	0.408696	0.5875	0.377778	0.305618	0.394203	0.566667	0.377639	0.305506	0.394058	0.566458	0.381111	0.308315	0.397681	0.571667
Cys	TGT	0.791619	0.742143	1.51127	1.02617	0.802286	0.752143	1.53164	1.04	0.790857	0.741429	1.50982	1.02519	0.790952	0.741518	1.51	1.02531	0.796667	0.746875	1.52091	1.03272	0.753714	0.706607	1.43891	0.977037	0.751429	0.704464	1.43455	0.974074
Asp	GAC	0.45657	0.549161	0.422204	0.388762	0.45093	0.542378	0.416989	0.38396	0.464942	0.559231	0.429946	0.395891	0.465	0.559301	0.43	0.395941	0.453488	0.545455	0.419355	0.386139	0.477674	0.574545	0.44172	0.406733	0.458721	0.551748	0.424194	0.390594
Asp	GAT	0.777404	0.680694	0.886386	0.756729	0.783087	0.68567	0.892866	0.762261	0.78571	0.687967	0.895857	0.764814	0.785792	0.688038	0.89595	0.764894	0.781011	0.683852	0.890498	0.760239	0.78735	0.689402	0.897726	0.76641	0.796721	0.697608	0.908411	0.775532
Glu	GAA	1.13878	0.964444	1.02251	0.856579	1.13808	0.963852	1.02188	0.856053	1.14627	0.97079	1.02924	0.862215	1.14638	0.970889	1.02935	0.862303	1.1356	0.961753	1.01966	0.854189	1.1695	0.990469	1.0501	0.879693	1.18017	0.999506	1.05969	0.887719
Glu	GAG	0.406988	0.403231	0.740395	0.682552	0.408354	0.404585	0.742881	0.684844	0.413913	0.410092	0.752994	0.694167	0.413944	0.410123	0.753051	0.694219	0.408012	0.404246	0.74226	0.684271	0.427764	0.423815	0.778192	0.717396	0.417267	0.413415	0.759096	0.699792
Phe	TTC	1.03957	1.22966	1.27331	1.16951	1.04961	1.24154	1.28562	1.18082	1.03512	1.2244	1.26787	1.16451	1.03773	1.22749	1.27107	1.16745	1.04126	1.23166	1.27538	1.17141	0.957246	1.13229	1.17249	1.0769	0.972271	1.15006	1.19089	1.0938
Phe	TTT	1.65138	1.38996	1.55172	1.37931	1.64931	1.38822	1.54978	1.37759	1.65775	1.39533	1.55772	1.38464	1.65794	1.39548	1.55789	1.38479	1.65491	1.39293	1.55504	1.38226	1.62115	1.36452	1.52332	1.35406	1.6733	1.40842	1.57233	1.39762
Gly	GGA	1.1926	1.27704	3.20678	2.6478	1.18645	1.27044	3.19022	2.63413	1.1862	1.27018	3.18956	2.63358	1.18632	1.27031	3.18989	2.63385	1.18756	1.27164	3.19322	2.63661	1.26566	1.35527	3.40322	2.81	1.23566	1.32314	3.32256	2.74339
Gly	GGC	0.903478	0.814902	0.297921	0.848163	0.904457	0.815784	0.298244	0.849082	0.924891	0.834216	0.304982	0.868265	0.930543	0.839314	0.306846	0.873571	0.903696	0.815098	0.297993	0.848367	0.912717	0.823235	0.300968	0.856837	0.901087	0.812745	0.297133	0.845918
Gly	GGG	1.3698	1.21496	1.23646	2.32867	1.37471	1.2193	1.24089	2.337	1.31667	1.16783	1.1885	2.23833	1.32186	1.17243	1.19319	2.24717	1.36853	1.21383	1.23531	2.3265	1.26157	1.11896	1.13876	2.14467	1.2949	1.14852	1.16885	2.20133
Gly	GGT	0.989955	1.22094	0.900697	0.91954	0.992568	1.22417	0.903074	0.921967	0.985946	1.216	0.897049	0.915816	0.981441	1.21044	0.892951	0.911632	0.996306	1.22878	0.906475	0.925439	1.06401	1.31228	0.968074	0.988326	1.04563	1.28961	0.951352	0.971255
His	CAC	0.709195	0.743373	0.629592	0.791026	0.708506	0.742651	0.62898	0.790256	0.677586	0.710241	0.601531	0.755769	0.677701	0.710361	0.601633	0.755897	0.701954	0.735783	0.623163	0.782949	0.694368	0.727831	0.616429	0.774487	0.703218	0.737108	0.624286	0.784359
His	CAT	1.1787	1.02302	1.19603	1.19603	1.18362	1.0273	1.20103	1.20103	1.16268	1.00912	1.17978	1.17978	1.16275	1.00918	1.17985	1.17985	1.17884	1.02314	1.19618	1.19618	1.20384	1.04484	1.22154	1.22154	1.19739	1.03925	1.215	1.215
Ile	ATA	2.12063	1.78133	4.94815	1.50112	2.12794	1.78747	4.96518	1.50629	2.13587	1.79413	4.9837	1.51191	2.12794	1.78747	4.96519	1.50629	2.11794	1.77907	4.94185	1.49921	2.06651	1.73587	4.82185	1.46281	2.06016	1.73053	4.80704	1.45831
Ile	ATC	0.870973	1.06007	0.665826	0.936802	0.860703	1.04757	0.657975	0.925756	0.853405	1.03868	0.652397	0.917907	0.85627	1.04217	0.654587	0.920988	0.86827	1.05678	0.66376	0.933895	0.845784	1.02941	0.64657	0.909709	0.831351	1.01184	0.635537	0.894186
Ile	ATT	1.86181	1.36618	1.34326	1.32987	1.86581	1.36911	1.34614	1.33272	1.88116	1.38038	1.35721	1.34369	1.88135	1.38051	1.35735	1.34382	1.86656	1.36966	1.34668	1.33326	1.93879	1.42266	1.39879	1.38485	1.936	1.42061	1.39678	1.38286
Lys	AAA	1.18373	1.06918	1.09816	0.870143	1.17403	1.06041	1.08916	0.863007	1.185	1.07032	1.09934	0.871074	1.18344	1.06891	1.09789	0.869928	1.18133	1.06701	1.09593	0.868377	1.16312	1.05056	1.07904	0.854988	1.17321	1.05968	1.0884	0.862411
Lys	AAG	0.405443	0.407938	1.23907	0.430455	0.40841	0.410923	1.24813	0.433604	0.421682	0.424277	1.28869	0.447695	0.423303	0.425908	1.29364	0.449416	0.404893	0.407385	1.23738	0.42987	0.376881	0.3792	1.15178	0.40013	0.391651	0.394062	1.19692	0.415812
Leu	CTA	1.64303	1.3443	4.0665	1.21388	1.6499	1.34992	4.0835	1.21896	1.65172	1.3514	4.088	1.2203	1.65192	1.35157	4.0885	1.22045	1.64838	1.34868	4.07975	1.21784	1.60485	1.31306	3.972	1.18567	1.62283	1.32777	4.0165	1.19896
Leu	CTC	0.497267	0.567801	0.727818	1.48259	0.497702	0.568298	0.728455	1.48389	0.445776	0.509007	0.652455	1.32907	0.445776	0.509007	0.652455	1.32907	0.497267	0.567801	0.727818	1.48259	0.454037	0.51844	0.664545	1.3537	0.450994	0.514965	0.660091	1.34463
Leu	CTG	0.587959	0.391973	0.113202	0.548762	0.587041	0.391361	0.113026	0.547905	0.596327	0.397551	0.114813	0.556571	0.596327	0.397551	0.114813	0.556571	0.586531	0.39102	0.112927	0.547429	0.591837	0.394558	0.113949	0.552381	0.612551	0.408367	0.117937	0.571714
Leu	CTT	1.06427	0.884448	2.19222	2.08528	1.05925	0.880276	2.18188	2.07545	1.04863	0.871448	2.16	2.05463	1.05087	0.87331	2.16462	2.05902	1.06685	0.886586	2.19752	2.09033	0.972614	0.808276	2.00342	1.90569	0.986929	0.820172	2.03291	1.93374
Leu	TTA	2.80252	2.38872	2.56058	1.35847	2.80677	2.39235	2.56446	1.36053	2.80118	2.38758	2.55935	1.35782	2.79748	2.38443	2.55597	1.35603	2.80843	2.39376	2.56597	1.36134	3.00157	2.55839	2.74245	1.45496	2.94433	2.5096	2.69014	1.42721
Leu	TTG	0.93689	0.764883	1.39864	0.71989	0.928947	0.758398	1.38679	0.713787	0.941818	0.768906	1.406	0.723676	0.941914	0.768984	1.40614	0.72375	0.933062	0.761758	1.39293	0.716949	0.936507	0.76457	1.39807	0.719596	0.941053	0.768281	1.40486	0.723088
Met	ATG	0.922	0.961234	0.83663	1.08081	0.922449	0.961702	0.837037	1.08134	0.924776	0.964128	0.839148	1.08407	0.922776	0.962043	0.837333	1.08172	0.919551	0.958681	0.834407	1.07794	0.946857	0.987149	0.859185	1.10995	0.942816	0.982936	0.855519	1.10522
Asn	AAC	0.487943	0.653718	0.476542	0.41121	0.476794	0.638782	0.465654	0.401815	0.483158	0.647308	0.471869	0.407177	0.483206	0.647372	0.471916	0.407218	0.486172	0.651346	0.474813	0.409718	0.491388	0.658333	0.479907	0.414113	0.497895	0.667051	0.486262	0.419597
Asn	AAT	1.29879	1.0456	1.55715	0.811289	1.29444	1.04209	1.55194	0.808571	1.29188	1.04004	1.54887	0.806975	1.2943	1.04199	1.55177	0.808487	1.29332	1.04119	1.55059	0.807871	1.32744	1.06866	1.59151	0.829188	1.32812	1.06921	1.59231	0.829608
Pro	CCA	0.734783	0.708383	1.39176	0.646448	0.727391	0.701257	1.37776	0.639945	0.713168	0.687545	1.35082	0.627432	0.710062	0.684551	1.34494	0.624699	0.729938	0.703713	1.38259	0.642186	0.686646	0.661976	1.30059	0.604098	0.681863	0.657365	1.29153	0.599891
Pro	CCC	2.12623	2.16712	1.94293	1.65721	2.07396	2.11385	1.89517	1.61647	2.06019	2.09981	1.88259	1.60574	2.06038	2.1	1.88276	1.60588	2.12057	2.16135	1.93776	1.65279	1.94906	1.98654	1.78103	1.51912	1.94189	1.97923	1.77448	1.51353
Pro	CCG	0.581047	1.24925	0.22922	0.94283	0.579302	1.2455	0.228532	0.94	0.57814	1.243	0.228073	0.938113	0.578256	1.24325	0.228119	0.938302	0.578837	1.2445	0.228349	0.939245	0.555	1.19325	0.218945	0.900566	0.571744	1.22925	0.22555	0.927736
Pro	CCT	0.864385	1.01025	2.21425	1.19733	0.873476	1.02087	2.23753	1.20993	0.868984	1.01562	2.22603	1.2037	0.871818	1.01894	2.23329	1.20763	0.867219	1.01356	2.22151	1.20126	0.901337	1.05344	2.3089	1.24852	0.874439	1.022	2.24	1.21126
Gln	CAA	1.33789	1.24187	1.73033	0.950733	1.34763	1.25091	1.74293	0.957656	1.35289	1.25579	1.74973	0.961392	1.35567	1.25837	1.75333	0.96337	1.34119	1.24493	1.7346	0.953077	1.38887	1.28919	1.79627	0.98696	1.39108	1.29124	1.79913	0.988535
Gln	CAG	0.513289	0.443295	0.264475	0.644793	0.510263	0.440682	0.262915	0.640992	0.542961	0.46892	0.279763	0.682066	0.539671	0.46608	0.278068	0.677934	0.516579	0.446136	0.266169	0.648926	0.50875	0.439375	0.262136	0.639091	0.522829	0.451534	0.26939	0.656777
Arg	AGA	0.928579	0.900153	6.08379	0.82831	0.935368	0.906735	6.12828	0.834366	0.925421	0.897092	6.0631	0.825493	0.920105	0.891939	6.02828	0.820751	0.934526	0.905918	6.12276	0.833615	0.912526	0.884592	5.97862	0.813991	0.893737	0.866378	5.85552	0.79723
Arg	AGG	0.607273	0.525984	3.51579	0.726087	0.611727	0.529843	3.54158	0.731413	0.577818	0.500472	3.34526	0.69087	0.573273	0.496535	3.31895	0.685435	0.606455	0.525276	3.51105	0.725109	0.521727	0.45189	3.02053	0.623804	0.504182	0.436693	2.91895	0.602826
Arg	CGA	2.07206	2.37345	3.34718	4.35133	2.07905	2.38145	3.35846	4.366	2.09111	2.39527	3.37795	4.39133	2.09952	2.40491	3.39154	4.409	2.07714	2.37927	3.35538	4.362	2.04254	2.33964	3.29949	4.28933	2.09651	2.40145	3.38667	4.40267
Arg	CGC	1.47605	1.24644	0.267095	2.15731	1.44632	1.22133	0.261714	2.11385	1.48395	1.25311	0.268524	2.16885	1.48395	1.25311	0.268524	2.16885	1.45842	1.23156	0.263905	2.13154	1.33553	1.12778	0.241667	1.95192	1.35421	1.14356	0.245048	1.97923
Arg	CGG	0.978163	0.840877	0.760794	2.81941	0.974898	0.83807	0.758254	2.81	0.93102	0.800351	0.724127	2.68353	0.931224	0.800526	0.724286	2.68412	0.974082	0.837368	0.757619	2.80765	0.801429	0.688947	0.623333	2.31	0.863469	0.742281	0.671587	2.48882
Arg	CGT	1.51844	1.84676	0.673202	2.13531	1.52378	1.85324	0.675567	2.14281	1.52644	1.85649	0.676749	2.14656	1.52656	1.85662	0.676798	2.14672	1.52811	1.85851	0.677488	2.14891	1.55056	1.88581	0.687438	2.18047	1.56911	1.90838	0.695665	2.20656
Ser	AGC	0.460265	0.460265	0.325062	0.530714	0.463628	0.463628	0.327438	0.534592	0.517168	0.517168	0.36525	0.596327	0.52177	0.52177	0.3685	0.601633	0.463274	0.463274	0.327188	0.534184	0.454425	0.454425	0.320937	0.52398	0.450354	0.450354	0.318063	0.519286
Ser	AGT	0.990714	0.918543	1.46	0.976761	0.994286	0.921854	1.46526	0.980282	0.995929	0.923377	1.46768	0.981901	0.988714	0.916689	1.45705	0.974789	0.993357	0.920993	1.46389	0.979366	1.03564	0.960199	1.52621	1.02106	1.02914	0.954172	1.51663	1.01465
Ser	TCA	0.663169	0.616041	1.5559	0.648984	0.665191	0.617919	1.56064	0.650963	0.652678	0.606294	1.53128	0.638717	0.649945	0.603756	1.52487	0.636043	0.664645	0.617411	1.55936	0.650428	0.650328	0.604112	1.52577	0.636417	0.665464	0.618173	1.56128	0.65123
Ser	TCC	1.37955	1.79663	1.73607	1.0881	1.37125	1.78581	1.72562	1.08155	1.31812	1.71663	1.65876	1.03965	1.32741	1.72872	1.67045	1.04697	1.37464	1.79023	1.72989	1.08423	1.29455	1.68593	1.6291	1.02106	1.27625	1.66209	1.60607	1.00662
Ser	TCG	0.69086	1.285	0.738506	0.747093	0.690323	1.284	0.737931	0.746512	0.711075	1.3226	0.760115	0.768953	0.711075	1.3226	0.760115	0.768953	0.689785	1.283	0.737356	0.74593	0.643118	1.1962	0.687471	0.695465	0.682366	1.2692	0.729425	0.737907
Ser	TCT	0.781071	0.960146	2.26241	0.837574	0.776587	0.954634	2.24943	0.832766	0.772976	0.950195	2.23897	0.828894	0.766944	0.94278	2.22149	0.822426	0.777937	0.956293	2.25333	0.834213	0.735952	0.904683	2.13172	0.789191	0.746468	0.91761	2.16218	0.800468
Thr	ACA	0.893185	0.916536	1.71012	0.787809	0.889873	0.913137	1.70378	0.784888	0.901146	0.924706	1.72537	0.794831	0.90121	0.924771	1.72549	0.794888	0.895605	0.91902	1.71476	0.789944	0.938917	0.963464	1.79768	0.828146	0.89949	0.923007	1.7222	0.793371
Thr	ACC	1.00495	1.24711	0.453991	0.815039	1.00728	1.25	0.455044	0.816929	1.00029	1.24133	0.451886	0.81126	1.00049	1.24157	0.451974	0.811417	1.00641	1.24892	0.454649	0.81622	0.956019	1.18639	0.431886	0.775354	0.960291	1.19169	0.433816	0.778819
Thr	ACG	0.860909	1.50659	0.447905	0.828625	0.867143	1.5175	0.451149	0.834625	0.845455	1.47955	0.439865	0.81375	0.852208	1.49136	0.443378	0.82025	0.866364	1.51614	0.450743	0.833875	0.815974	1.42795	0.424527	0.785375	0.846494	1.48136	0.440405	0.81475
Thr	ACT	1.28206	1.55806	2.46549	1.10522	1.28554	1.56229	2.4722	1.10823	1.29469	1.5734	2.48978	1.11611	1.29486	1.57361	2.49011	1.11626	1.28446	1.56097	2.47011	1.10729	1.29109	1.56903	2.48286	1.113	1.27749	1.5525	2.4567	1.10128
Val	GTA	2.13758	2.07471	1.90649	1.79339	2.13232	2.06961	1.9018	1.78898	2.13333	2.07059	1.9027	1.78983	2.13354	2.07078	1.90288	1.79	2.13566	2.07284	1.90477	1.79178	2.21515	2.15	1.97568	1.85847	2.18303	2.11882	1.94703	1.83153
Val	GTC	0.497969	0.564071	0.422119	0.540169	0.505625	0.572743	0.428609	0.548475	0.500625	0.56708	0.424371	0.543051	0.504687	0.571681	0.427815	0.547458	0.497187	0.563186	0.421457	0.539322	0.486094	0.550619	0.412053	0.527288	0.495781	0.561593	0.420265	0.537797
Val	GTG	0.460115	0.473728	0.313961	0.741296	0.451667	0.46503	0.308196	0.727685	0.441897	0.45497	0.301529	0.711944	0.436034	0.448935	0.297529	0.7025	0.448276	0.461538	0.305882	0.722222	0.430517	0.443254	0.293765	0.693611	0.420575	0.433018	0.28698	0.677593
Val	GTT	0.793015	0.891322	1.16595	0.976018	0.796875	0.895661	1.17162	0.980769	0.789632	0.887521	1.16097	0.971855	0.789743	0.887645	1.16114	0.971991	0.794301	0.892769	1.16784	0.977602	0.83511	0.938636	1.22784	1.02783	0.819779	0.921405	1.2053	1.00896
Trp	TGG	1.47264	1.32432	1.21105	1.77	1.48336	1.33396	1.21987	1.78288	1.54192	1.38662	1.26803	1.85327	1.54208	1.38676	1.26816	1.85346	1.48208	1.33281	1.21882	1.78135	1.47888	1.32993	1.21618	1.7775	1.46824	1.32036	1.20743	1.76471
Tyr	TAC	0.543431	0.783684	0.615289	0.503041	0.54365	0.784	0.615537	0.503243	0.546277	0.787789	0.618512	0.505676	0.54635	0.787895	0.618595	0.505743	0.543139	0.783263	0.614959	0.50277	0.524745	0.756737	0.594132	0.485743	0.538394	0.776421	0.609587	0.498378
Tyr	TAT	1.97678	1.77061	1.74915	1.53516	1.97363	1.76779	1.74636	1.53271	2.00479	1.79571	1.77394	1.55691	2.01205	1.80221	1.78036	1.56255	1.97541	1.76939	1.74794	1.5341	1.97788	1.7716	1.75012	1.53601	2.04027	1.82748	1.80533	1.58447
Ter	TAA	1.53	3.4425	0.6885	1.25182	1.54111	3.4675	0.6935	1.26091	1.53778	3.46	0.692	1.25818	1.53778	3.46	0.692	1.25818	1.54	3.465	0.693	1.26	1.61111	3.625	0.725	1.31818	1.65222	3.7175	0.7435	1.35182
Ter	TAG	1.836	2.295	3.06	1.836	1.85	2.3125	3.08333	1.85	2.05	2.5625	3.41667	2.05	2.05	2.5625	3.41667	2.05	1.848	2.31	3.08	1.848	1.57	1.9625	2.61667	1.57	1.6	2	2.66667	1.6
Ter	TGA	0.85	1.45714	0.927273	1.45714	0.813333	1.39429	0.887273	1.39429	0.725833	1.24429	0.791818	1.24429	0.726667	1.24571	0.792727	1.24571	0.8125	1.39286	0.886364	1.39286	0.554167	0.95	0.604545	0.95	0.571667	0.98	0.623636	0.98
